# Supplementary material for: Photoconversion of 6,13-α-diketopentacene single crystals exhibiting light intensity-dependent morphological change
Source: Royal Society of Chemistry journal article supplement (doi:10.1039/c8cp06594b), 2018-12-17
Supplement: c8cp06594b1.pdf [file c8cp06594b1.pdf]

## Electronic Supplementary Information

# Photoconversion of 6, 13- $\alpha$ -Diketopentacene Single Crystals Exhibiting Light Intensity-Dependent Morphological Change

Mitsuaki Yamauchi,<sup>a</sup> Yuya Miyamoto,<sup>a</sup> Mitsuharu Suzuki,<sup>b</sup> Hiroko Yamada,<sup>b</sup> Sadahiro Masuo<sup>\*a</sup>

<sup>a</sup> Department of Applied Chemistry for Environment, Kwansai Gakuin University, 2-1 Gakuen,

Sanda, Hyogo 669-1337, Japan

<sup>b</sup> Graduate School of Materials Science, Nara Institute of Science and Technology, Ikoma 630-0192,  
Japan

### Instrumental Setup and Methods

The  $\mu\text{m}$ -sized PDK crystals were placed on a clean glass coverslip, which was set on the stage of an inverted confocal microscope (IX71, Olympus) combining with an AFM system (JPK Instruments, NanoWizard II), as shown in Figure S1.<sup>S1</sup> As a light source for photoconversion, a 488 nm continuous-wave laser (Cyan-MA5, Spectra-Physics) was used. For the photoirradiation with strong laser intensity with  $100 \sim 1000 \text{ kWcm}^{-2}$ , the laser beam was focused onto the surface of the single  $\mu\text{m}$ -sized PDK crystal with the size of the diffraction limit through an objective lens (100 $\times$ , N.A. 1.40, Olympus). In the case of the laser intensity below  $100 \text{ kWcm}^{-2}$ , the laser beams was irradiated at the area with 25  $\mu\text{m}$  in diameter. For the UV/vis absorption spectrum measurement of a single crystal under the optical microscope, halogen lamp of the microscope, that is, Köhler illumination system, was used as the incident light. The spectrum was measured using a spectrometer (SpectraPro2358, Acton Research Corporation) with a cooled CCD camera (PIXIS400B, Princeton Instruments), as shown in Figure S1. The all spectra were obtained by the accumulation time of 5 s.

The morphological changes during photoirradiation were analyzed by atomic force microscopy (AFM). All measurements were performed at room temperature in a dark room.

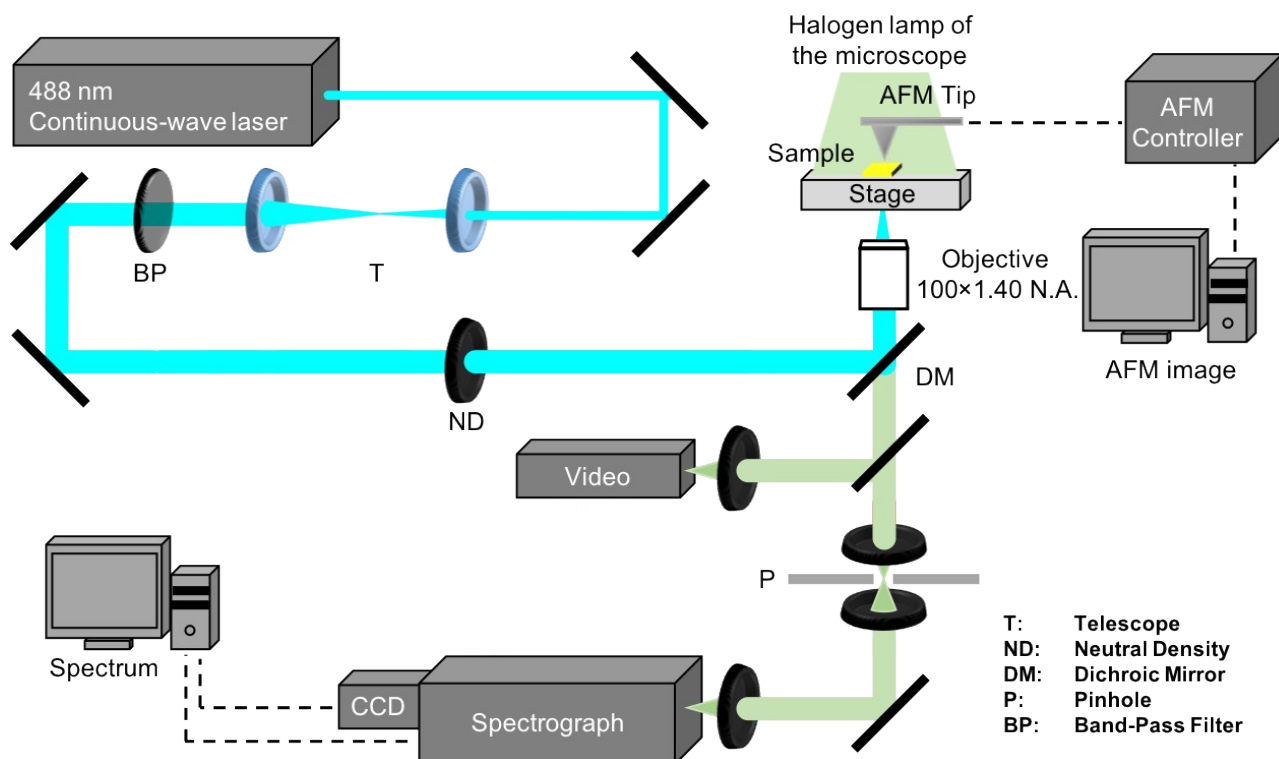

Figure S1. Schematic representation of experimental set-up for confocal microscope combining with AFM system.

## Reference

[S1] S. Masuo, K. Kanetaka, R. Sato and T. Teranishi, *ACS Photonics*, 2016, **3**, 109–116.
